# Supplementary material
Source: PubMed Central journal article supplement (PMC5278765)

## Supplementary figure1- Uncropped gel pictures

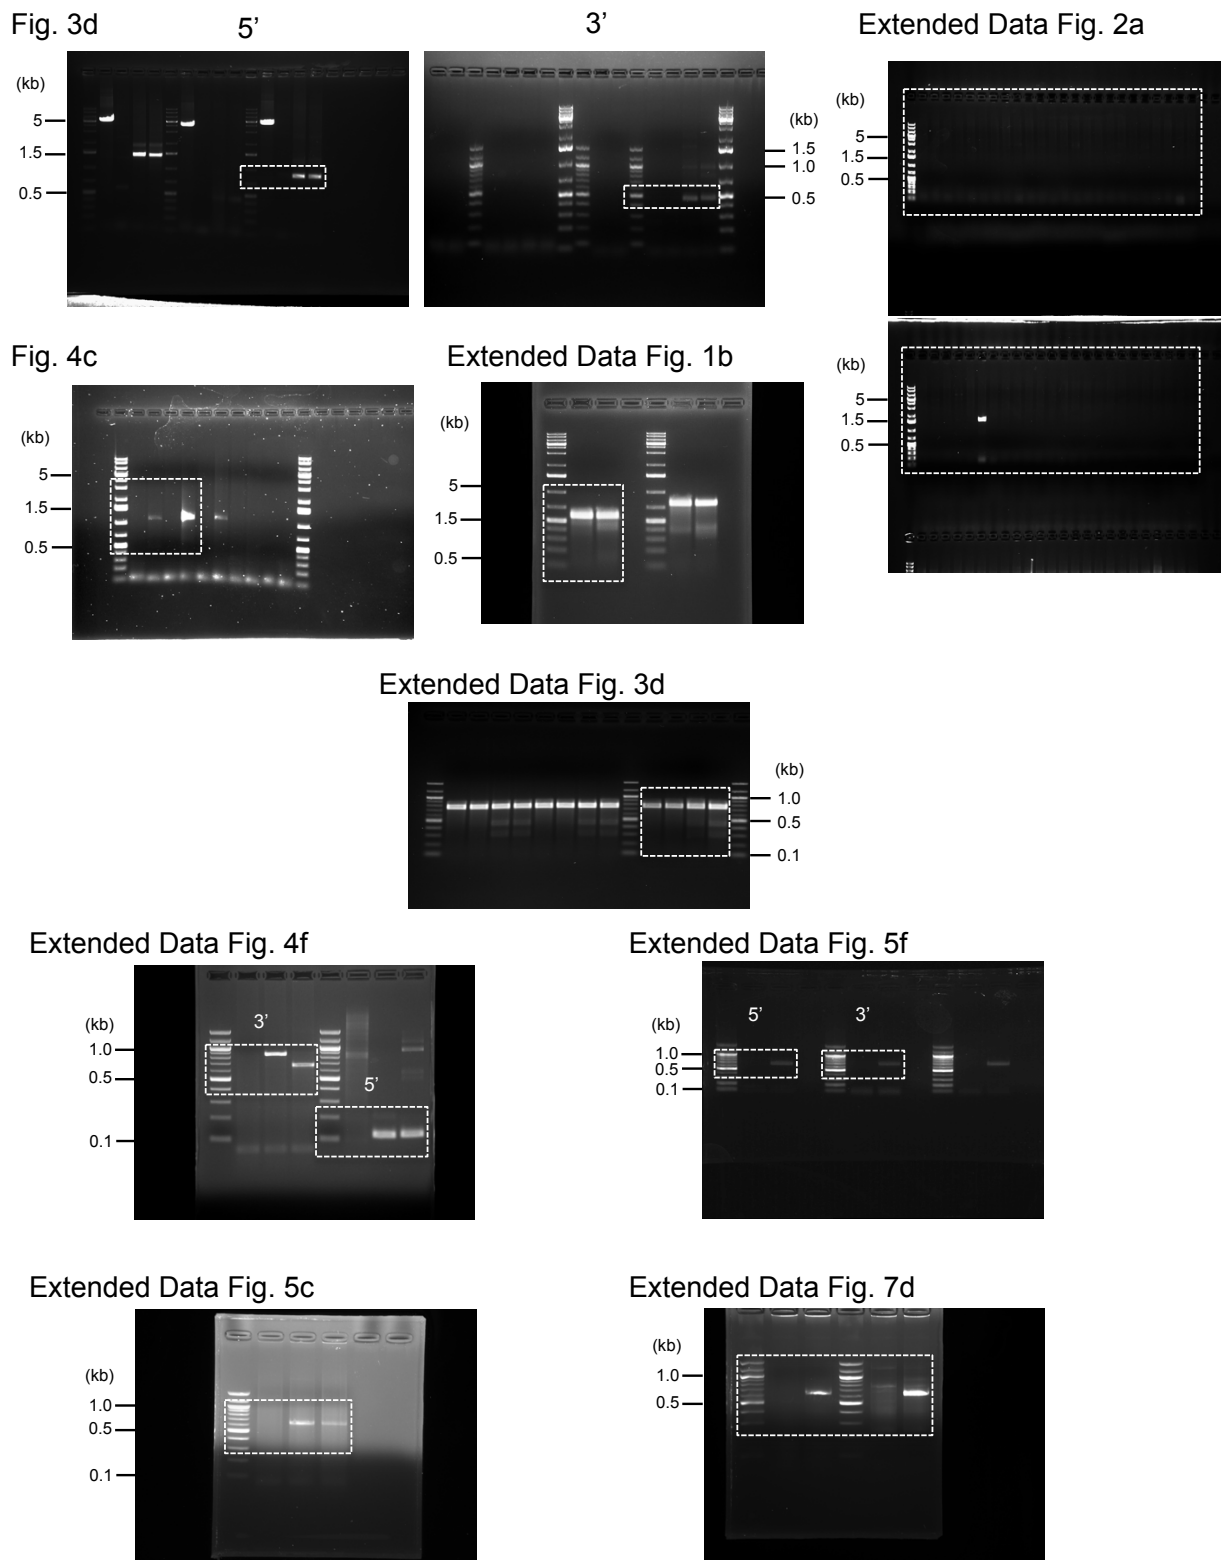

Supplement: NIHMS836789-supplement-Supplementary_Info.pdf [file NIHMS836789-supplement-Supplementary_Info.pdf]
